# Supplementary material for: Synthesis of (chlorovinyl)cobaloxime complexes, model complexes of proposed intermediates in the B12-catalyzed dehalogenation of chlorinated ethylenesElectronic supplementary information (ESI) available: full experimental details and characterization of complexes 1–3, and X-ray diffraction data. See http://www.rsc.org/suppdata/cc/b1/b109001a/
Source: Royal Society of Chemistry journal article supplement (doi:10.1039/b109001a), 2002-01-16
Supplement: b109001a.doc [file b109001a.doc]

# Supplementary data

Synthesis of (chlorovinyl)cobaloxime complexes, model complexes of proposed intermediates in the B12-catalyzed dehalogenation of chlorinated ethylenes

Autumn E. Rich, Angela D. DeGreeff and Kristopher McNeill*

Department of Chemistry, University of Minnesota, 207 Pleasant St. SE, Minneapolis, MN. Fax: 612-626-7541; Tel: 612-625-0781; E-mail: mcneill@chem.umn.edu

# Experimental

**Instrumentation*.***  The 1H NMR and 13C NMR spectra were acquired on a variety of instruments including Varian Unity, 300 MHz, Varian Inova, 500 MHz, and Varian Inova, 300 MHz. Melting points were determined with a Büchi melting point apparatus, calibrated using the melting points of benzophenone and maleic acid. GC-MS data was acquired with an Agilent GC 6890 Series (column is HP-5MS crosslinked 5% PH ME Siloxane, 30 m x 0.25 mm x 0.25 μm film thickness) coupled to an Agilent MS 5973 Network Mass Selective Detector. Infrared absorption spectra were obtained with use of the attenuated total reflectance (ATR) method on a Nicolet Magna-IR System 560 spectrometer equipped with a ZnSe trough HATR cell from PIKE Technologies. Data were processed with OMNIC ESP v. 4.1 software. Sample films were coated on the ZnSe crystal from a chloroform solution. Ultraviolet-visible spectra were performed on a Hewlett Packard 8452A Diode Array Spectrophotometer. Data were processed with Hewlett Packard ChemStation software. Elemental Analysis samples were performed externally by Atlantic Microlab, Inc., Norcross, Georgia. The X-ray Powder Diffraction Pattern was collected at room temperature (22 °C) with Siemens D-500 diffractometer with a 2.2 kW sealed copper source equipped with a single-crystal graphite monochromator and scintillation counter. Data were processed with use of Jade v. 3.0 software. Complete powder diffraction patterns were collected for 2*θ* = 8-40˚ with slits = [1˚, 1˚, 1˚, 0.15˚, 0.15˚], 2*θ* stepping rate = 0.02˚, and angle dwelling rate = 2 s.

***Cis*-(dmgH)2(py)Co(CCl=CHCl) (1).** Cobalt(II)acetate (0.502 g, 2.01 mmol) was combined with dimethylglyoxime (0.468 g, 4.01 mmol) and pyridine (485 μL, 6.00 mmol). Dry, degassed THF (50 mL) was added and the solution stirred under N2. Zinc dust (0.664 g, 10.1 mmol) was added, and the solution was then heated to reflux for 15 min. The solution was cooled to room temperature, and TCE (270 μL, 3.00 mmol) was added. The solution was then heated to reflux for 1 h. The solution was then cooled to room temperature and filtered through Celite. The solvent was removed under vacuum, and the residue was dissolved in chloroform (50 mL). The solution was then washed with H2O (2 x 10 mL), and the aqueous layers were combined and back-extracted with chloroform (5 x 10 mL). The chloroform layers were combined, dried (MgSO4), and filtered. The solvent was removed under vacuum. The yellow product was chromatographed (SiO2, 5 cm x 18 cm, EtOAc). 44.7 % yield (0.134 g, 0.289 mmol) after chromatography. 1H NMR (CDCl3) δ 8.55 (d, *J=*6.3 Hz, 2 H), 7.75 (t, *J=*7.5 Hz, 1 H), 7.32 (t, *J=*7.5 Hz, 2 H), 5.79 (s, 1 H), 2.19 (s, 12 H). IR (cm-1) 2958.8 (w), 2923.9 (w), 2869.6 (w), 1730.3 (m), 1656.7 (m), 1559.8 (s), 1455.2 (m), 1234.3 (s), 1156.8 (m), 1083.2 (m). UV-vis (nm) 258.0 (shoulder ~310).

***(*dmgH)2(py)Co(*trans*-CH=CHCl) (2).** Same procedure as for **1** except with *trans*-DCE (308 μL, 4.00 mmol) as the ethylene. 21.3 % yield (0.183 g, 0.426 mmol) after chromatography. 1H NMR (CDCl3) δ 8.58 (d, *J=*6.6 Hz, 2 H), 7.75 (t, *J=*7.5 Hz, 1 H), 7.33 (t, *J=*7.5 Hz, 2 H), 6.23 (d, *J*=12.1 Hz, 1 H), 5.29 (d, *J*=12.1 Hz, 1 H), 2.14 (s, 12 H). IR (cm-1) 2982.3 (w), 1557.4 (s), 1451.7 (s), 1371.5 (w), 1233.0 (s), 1090.9 (s), 1069.0 (s), 926.9 (m), 741.0 (s). UV-vis (nm) 258.0 (shoulder ~305). Anal. Calcd for C15H21ClCoN5O4: C, 41.92; H, 4.93; N, 16.30. Found: C, 41.97; H, 4.90; N, 16.21.

**(dmgH)2(py)Co(CCl=CH2) (3).** Same procedure as for **1** except with 1,1-DCE (320 μL, 4.00 mmol) as the ethylene. 46.8 % yield (0.404 g, 0.940 mmol) after chromatography. 1H NMR (CDCl3) δ 8.58 (d, *J=*5.5 Hz, 2 H), 7.74 (t, *J=*7.5 Hz, 1 H), 7.33 (t, *J=*7.5 Hz, 2 H), 5.23 (d, *J*=2.1 Hz, 1 H), 5.04 (d, *J*=2.1 Hz, 1 H), 2.18 (s, 12 H). IR (cm-1) 2988.6 (m), 2923.6 (w), 1566.6 (s), 1443.9 (m), 1375.3 (w), 1234.6 (s), 1083.0 (s), 866.5 (m), 751.0 (s). UV-vis (nm) 256.0 (shoulder ~305). Anal. Calcd for C15H­21ClCoN5O4: C, 41.92; H, 4.93; N, 16.30. Found: C, 42.15; H, 5.03; N, 16.34.

**Figure S1.** X-ray powder diffraction pattern of complex **1** with the X-ray powder diffraction pattern calculated from known unit cell parameters (P. G. Jones, L. Yang, and D. Steinborn, *Acta Crystallogr., Sect. C: Cryst. Struct. Commun.*, 1996, **C52**, 2399).

**X-ray Information for *Trans*-(dmgH)2(py)Co(CH=CHCl) (**2**)**

Data collection and structure solution were conducted at the X-Ray Crystallographic Laboratory, 160 Kolthoff Hall, Department of Chemistry, University of Minnesota. All calculations were performed using SGI INDY R4400-SC or Pentium computers using the current SHELXTL suite of programs.

Data collection

A crystal (approximate dimensions 0.23 x 0.20 x 0.15 mm3) was placed onto the tip of a 0.1 mm diameter glass capillary and mounted on a Bruker SMART system for a data collection at 173(2) K. A preliminary set of cell constants was calculated from reflections harvested from three sets of 20 frames. These initial sets of frames were oriented such that orthogonal wedges of reciprocal space were surveyed. This produced initial orientation matrices determined from 116 reflections. The data collection was carried out using MoKα radiation (graphite monochromator) with a frame time of 30 seconds and a detector distance of 4.9 cm. A randomly oriented region of reciprocal space was surveyed to the extent of 1 hemisphere and to a resolution of 0.84 Å. Three major sections of frames were collected with 0.30º steps in ω at 3 different φsettings and a detector position of -28° in 2θ. The intensity data were corrected for absorption and decay (SADABS).1 Final cell constants were calculated from the xyz centroids of 1849 strong reflections from the actual data collection after integration (SAINT 6.01, 1999).2 Please refer to Table 1 for additional crystal and refinement information.

Structure solution and refinement

The structure was solved using SHELXS-863 and refined using SHELXL-97.3 The space group *P*212121 was determined based on systematic absences and intensity statistics. A direct-methods solution was calculated which provided most non-hydrogen atoms from the E-map. Full-matrix least squares / difference Fourier cycles were performed which located the remaining non-hydrogen atoms. All non-hydrogen atoms were refined with anisotropic displacement parameters unless stated otherwise. All hydrogen atoms were placed in ideal positions and refined as riding atoms with relative isotropic displacement parameters. The final full matrix least squares refinement converged to R1 = 0.0344 and wR2 = 0.0935 (F2, all data). One C atom (C2) of the chloroethene molecule was found to be disordered over two sites. A refined occupancy of the two found the ratio to be 45:55 C2:C2’. The H atom on C2 and C2’ were omitted.

Structure description.

The structure was found to be the proposed (dmgH)2(py)Co(*trans*-CH=CHCl).

**Figure S2.** X-ray structure of (dmgH)2(py)Co(*trans*-CH=CHCl).

**Figure S3.** Unit cell of (dmgH)2(py)Co(*trans*-CH=CHCl).

Table S1. Crystal data and structure refinement for **2**.

________________________________________________________________________________

Identification code 01058

Empirical formula C15 H21 Cl Co N5 O4

Formula weight 429.75

Temperature 173(2) K

Wavelength 0.71073 Å

Crystal system Orthorhombic

Space group *P*212121

Unit cell dimensions a = 9.630(2) Å = 90°.

b = 12.377(2) Å = 90°.

c = 15.402(3) Å  = 90°.

Volume 1835.8(6) Å3

Z 4

Density (calculated) 1.555 Mg/m3

Absorption coefficient 1.112 mm-1

F(000) 888

Crystal habit and color yellow, block

Crystal size 0.23 x 0.20 x 0.15 mm3

Theta range for data collection 2.11 to 25.05°.

Index ranges -11= h = 11, 0= k = 14, 0= l = 18

Reflections collected 9319

Independent reflections 3259 [R(int) = 0.037]

Observed Reflections 2914

Completeness to theta = 25.05° 99.7 %

Absorption correction Multiscan

Max. and min. transmission 0.8510 and 0.7841

Refinement method Full-matrix least-squares on F2

Data / restraints / parameters 3259 / 0 / 247

Goodness-of-fit on F2 1.020

Final R indices [I>2sigma(I)] R1 = 0.0344, wR2 = 0.0893

R indices (all data) R1 = 0.0397, wR2 = 0.0935

Absolute structure parameter 0.01(2)

Largest diff. peak and hole 0.437 and -0.435 e.Å-3

Table S2. Atomic coordinates (x 104) and equivalent isotropic displacement parameters (Å2x 103)

for **2**. Ueq is defined as one third of the trace of the orthogonalized Uij tensor.

________________________________________________________________________________

x y z U(eq)

________________________________________________________________________________

Co1 7493(1) 8687(1) 2456(1) 22(1)

Cl1 7463(1) 5578(1) 4051(1) 59(1)

C1 7354(5) 7495(2) 3260(2) 42(1)

C2 7250(60) 6539(9) 3188(9) 51(8)

C2' 8000(30) 6634(12) 3318(11) 40(5)

N11 9423(2) 8746(2) 2645(2) 28(1)

C12 9848(3) 9362(2) 3262(2) 28(1)

C13 8719(3) 9877(2) 3739(2) 27(1)

N14 7488(3) 9623(2) 3427(1) 24(1)

O15 10354(2) 8200(2) 2149(2) 37(1)

O16 6332(2) 9999(2) 3777(1) 32(1)

C17 11344(3) 9538(3) 3485(2) 42(1)

C18 8923(3) 10594(2) 4505(2) 35(1)

N21 7484(3) 7739(2) 1495(1) 25(1)

C22 6273(3) 7453(2) 1190(2) 25(1)

C23 5121(3) 7962(2) 1673(2) 28(1)

N24 5557(2) 8570(2) 2305(2) 28(1)

O25 8656(2) 7357(2) 1144(1) 34(1)

O26 4632(2) 9068(2) 2831(2) 36(1)

C27 6064(3) 6678(2) 465(2) 30(1)

C28 3636(3) 7763(3) 1462(2) 38(1)

N31 7598(3) 10005(2) 1663(1) 27(1)

C32 6593(4) 10762(3) 1684(2) 42(1)

C33 6661(5) 11695(3) 1201(2) 62(1)

C34 7761(5) 11854(3) 659(2) 59(1)

C35 8800(4) 11082(3) 621(2) 47(1)

C36 8669(4) 10170(3) 1135(2) 36(1)

________________________________________________________________________________

Table S3. Bond lengths [Å] and angles [°] for **2**.

________________________________________________________________________________

Co1-N11 1.883(2)

Co1-N24 1.885(2)

Co1-N21 1.889(2)

Co1-N14 1.891(2)

Co1-C1 1.931(3)

Co1-N31 2.040(2)

Cl1-C2 1.795(16)

Cl1-C2' 1.802(13)

C1-C2 1.192(13)

C1-C2' 1.236(11)

N11-C12 1.285(4)

N11-O15 1.358(3)

C12-C13 1.459(4)

C12-C17 1.498(4)

C13-N14 1.318(4)

C13-C18 1.488(4)

N14-O16 1.322(3)

N21-C22 1.306(4)

N21-O25 1.337(4)

C22-C23 1.477(4)

C22-C27 1.485(4)

C23-N24 1.300(4)

C23-C28 1.487(4)

N24-O26 1.353(3)

N31-C36 1.329(4)

N31-C32 1.348(4)

C32-C33 1.375(5)

C33-C34 1.362(6)

C34-C35 1.385(5)

C35-C36 1.385(4)

N11-Co1-N24 177.16(10)

N11-Co1-N21 98.59(13)

N24-Co1-N21 81.42(13)

N11-Co1-N14 81.77(12)

N24-Co1-N14 98.19(12)

N21-Co1-N14 179.25(12)

N11-Co1-C1 89.91(17)

N24-Co1-C1 87.26(17)

N21-Co1-C1 91.60(11)

N14-Co1-C1 87.75(10)

N11-Co1-N31 90.75(12)

N24-Co1-N31 92.09(12)

N21-Co1-N31 91.55(8)

N14-Co1-N31 89.10(9)

C1-Co1-N31 176.65(13)

C2-Cl1-C2' 24.2(8)

C2-C1-C2' 36.2(12)

C2-C1-Co1 134.8(7)

C2'-C1-Co1 132.1(6)

C1-C2-Cl1 125.4(16)

C1-C2'-Cl1 121.8(12)

C12-N11-O15 120.1(2)

C12-N11-Co1 116.8(2)

O15-N11-Co1 123.07(18)

N11-C12-C13 113.3(2)

N11-C12-C17 124.2(3)

C13-C12-C17 122.5(3)

N14-C13-C12 112.4(3)

N14-C13-C18 123.4(3)

C12-C13-C18 124.2(3)

C13-N14-O16 121.6(2)

C13-N14-Co1 115.6(2)

O16-N14-Co1 122.7(2)

C22-N21-O25 120.8(2)

C22-N21-Co1 117.0(2)

O25-N21-Co1 122.2(2)

N21-C22-C23 112.0(2)

N21-C22-C27 124.5(3)

C23-C22-C27 123.5(3)

N24-C23-C22 112.4(2)

N24-C23-C28 124.7(3)

C22-C23-C28 122.8(3)

C23-N24-O26 120.0(2)

C23-N24-Co1 117.17(19)

O26-N24-Co1 122.82(19)

C36-N31-C32 117.7(3)

C36-N31-Co1 121.9(2)

C32-N31-Co1 120.4(2)

N31-C32-C33 122.4(3)

C34-C33-C32 119.3(3)

C33-C34-C35 119.3(3)

C36-C35-C34 118.1(3)

N31-C36-C35 123.1(3)

________________________________________________________________________________

Table A4. Anisotropic displacement parameters (Å2x 103) for **2**. The anisotropic

displacement factor exponent takes the form: -22[ h2 a*2U11 + ... + 2 h k a* b* U12 ]

________________________________________________________________________________

U11 U22 U33 U23 U13 U12

________________________________________________________________________________

Co1 20(1) 21(1) 24(1) -2(1) 2(1) 0(1)

Cl1 95(1) 34(1) 49(1) 15(1) 9(1) 9(1)

C1 66(3) 30(2) 28(2) 0(1) -4(2) -6(2)

C2 80(20) 39(5) 31(5) 11(4) -1(7) 4(6)

C2' 39(11) 45(5) 36(4) 13(4) 4(5) 18(5)

N11 25(1) 26(1) 34(1) -1(1) 5(1) 1(1)

C12 28(2) 23(1) 32(2) 2(1) -4(1) -4(1)

C13 34(2) 23(1) 25(2) 1(1) -1(1) -3(1)

N14 24(1) 23(1) 26(1) 1(1) 3(1) 0(1)

O15 27(1) 39(1) 45(1) -15(1) 3(1) 5(1)

O16 30(1) 32(1) 33(1) -6(1) 6(1) 2(1)

C17 28(2) 41(2) 55(2) -5(2) -8(2) -1(1)

C18 44(2) 31(2) 32(2) -4(1) 1(1) -8(1)

N21 25(1) 22(1) 29(1) 0(1) 2(1) 0(1)

C22 29(2) 19(1) 26(2) 1(1) 0(1) -4(1)

C23 24(2) 24(1) 35(2) -1(1) -2(1) -1(1)

N24 26(1) 24(1) 33(1) -4(1) 6(1) 1(1)

O25 30(1) 34(1) 37(1) -10(1) 9(1) 1(1)

O26 25(1) 38(1) 44(1) -15(1) 7(1) 2(1)

C27 33(2) 30(2) 27(2) -5(1) -1(1) -4(1)

C28 26(2) 37(2) 51(2) -5(2) -7(2) 0(1)

N31 32(1) 26(1) 25(1) -2(1) 1(1) -2(1)

C32 54(2) 34(2) 38(2) 3(2) 4(2) 13(2)

C33 102(3) 36(2) 48(2) 9(2) 7(2) 26(2)

C34 109(4) 27(2) 41(2) 7(1) 8(2) -9(2)

C35 69(2) 37(2) 35(2) 7(2) 9(2) -13(2)

C36 42(2) 32(2) 34(2) 0(1) 4(2) -3(1)

________________________________________________________________________________

________________________________________________________________________________

Table A5. Hydrogen bonds for **2** [Å and °].

________________________________________________________________________________

D-H...A d(D-H) d(H...A) d(D...A) <(DHA)

________________________________________________________________________________

O26-H26...O16 0.84 1.67 2.477(3) 159.1

O15-H15...O25 0.84 1.67 2.482(3) 161.3

________________________________________________________________________________

________________________________________________________________________________

1 An empirical correction for absorption anisotropy, R. Blessing, Acta Cryst. A51, 33 - 38 (1995).

2 SAINT V6.1, Bruker Analytical X-Ray Systems, Madison, WI.

3 SHELXTL-Plus V5.10, Bruker Analytical X-Ray Systems, Madison, WI.
